# Supplementary material
Source: PubMed Central journal article supplement (PMC6043388)

**% of Max**

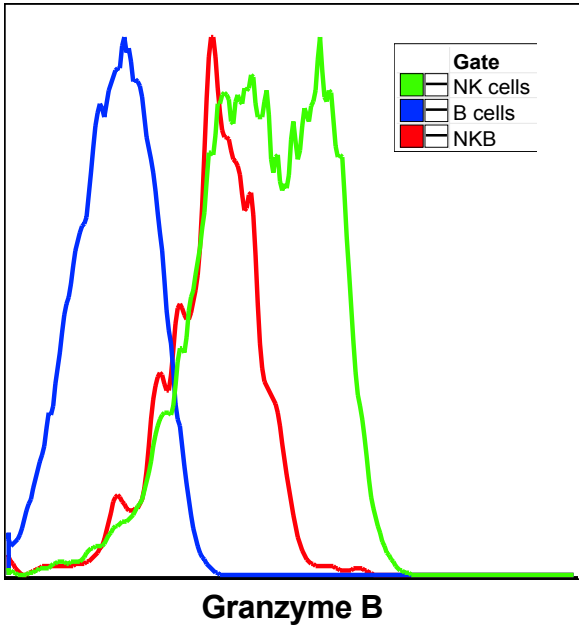

Supplement: NIHMS966373-supplement-Supplementary_Figure_1.pdf [file NIHMS966373-supplement-Supplementary_Figure_1.pdf]

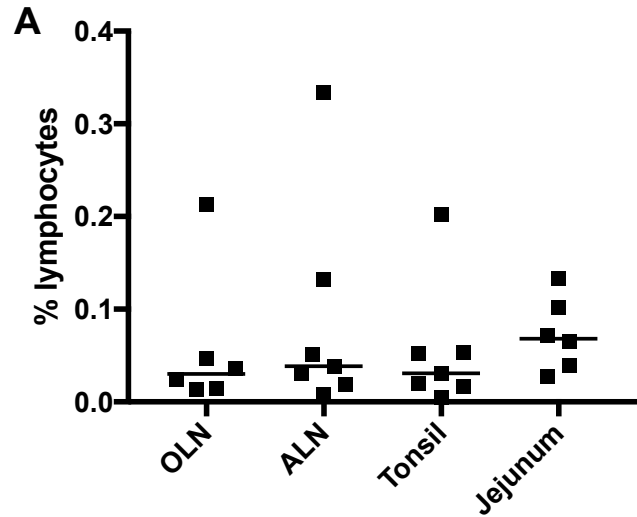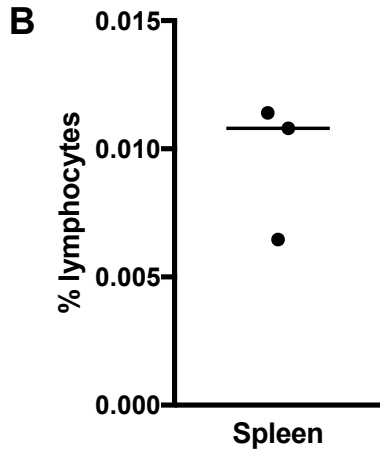

Supplement: NIHMS966373-supplement-Supplementary_Figure_2.pdf [file NIHMS966373-supplement-Supplementary_Figure_2.pdf]
